# Supplementary figures and images for: Clinical and laboratory features of patients diagnosed with alpha‐gal syndrome—2010–2019
Source: PubMed Central journal article supplement — Allergy. 2022 Oct 14;78(2):477–87. doi: 10.1111/all.15539 (PMC10092820; doi:10.1111/all.15539), 2022-10-14

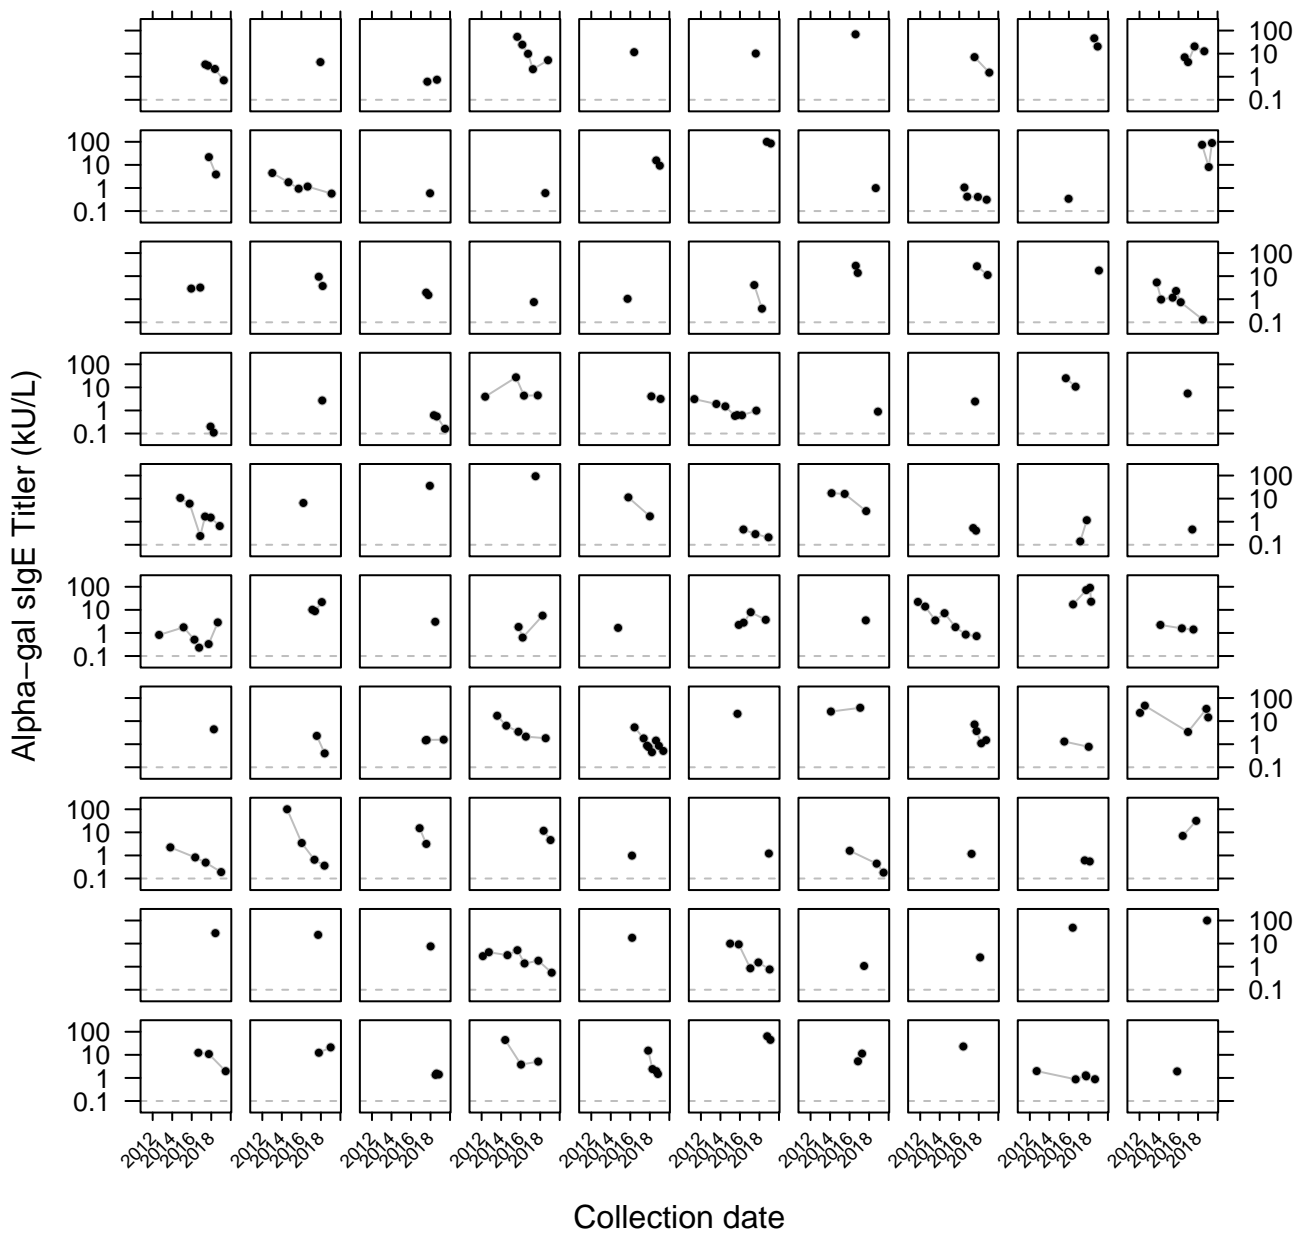

Supplemental Figure 2\_Binder et al.

Supplement: ALL-78-477-s001.pdf [file ALL-78-477-s001.pdf]

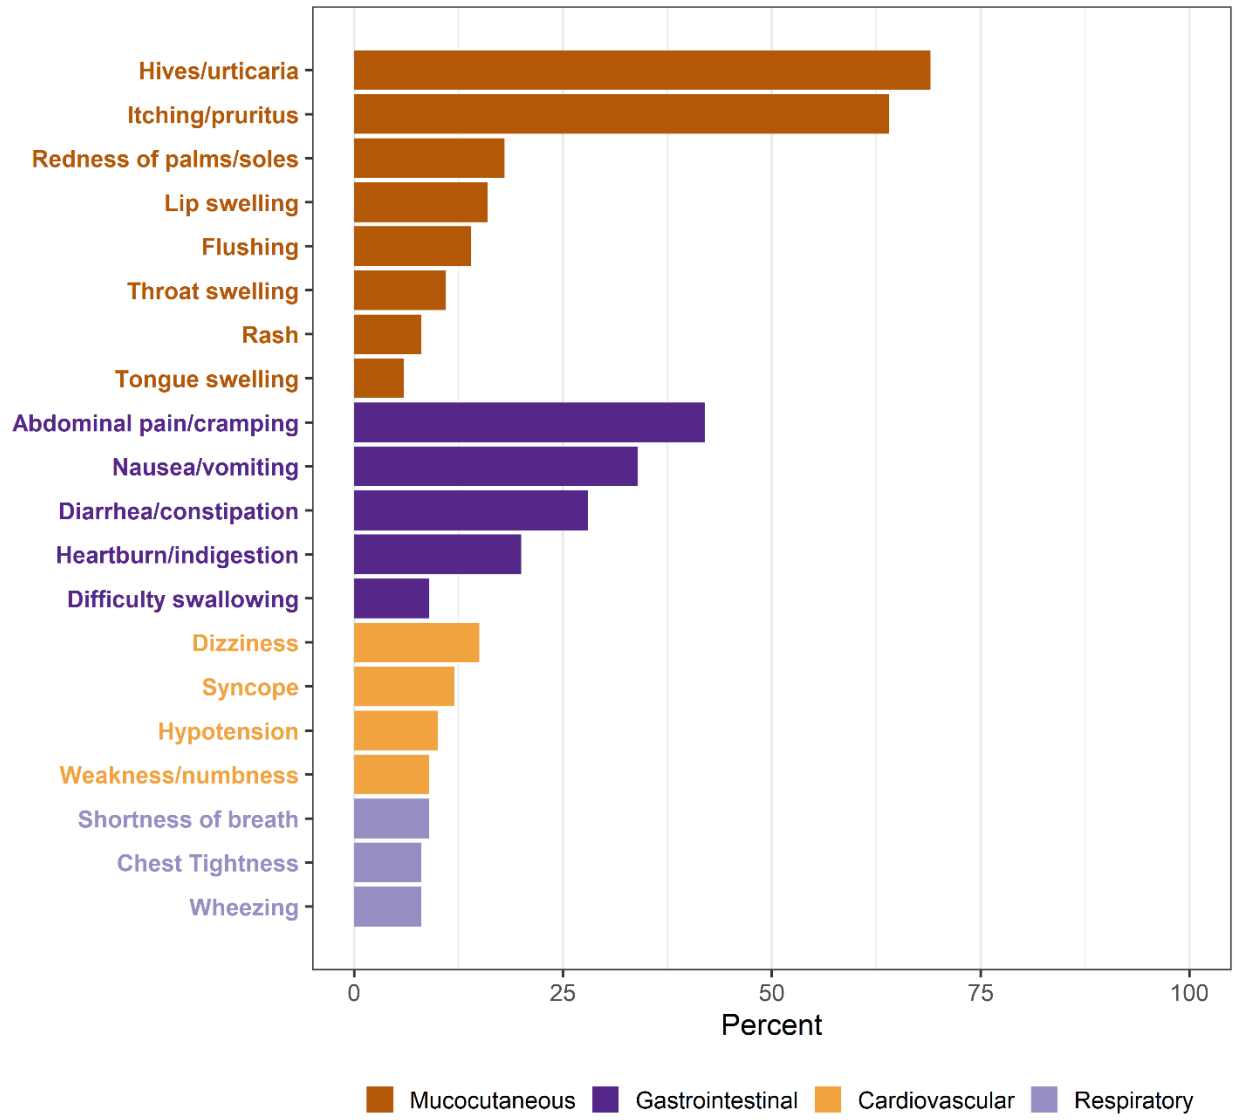

Supplement: ALL-78-477-s002.pdf [file ALL-78-477-s002.pdf]
